# Supplementary material for: A nitrogen-doped carbon modified nickel catalyst for the hydrogenation of levulinic acid under mild conditions
Source: Royal Society of Chemistry journal article supplement (doi:10.1039/d1gc01732b), 2021-01-01
Supplement: d1gc01732b1.pdf [file d1gc01732b1.pdf]

# Nitrogen-doped carbon modified nickel catalyst for the hydrogenation of levulinic acid under mild conditions

*Liang Jiang<sup>‡1</sup>, Guangyue Xu<sup>‡1</sup>, Yao Fu<sup>\*1</sup>*

1. Anhui Province Key Laboratory of Biomass Clean Energy, CAS Key Laboratory of Urban Pollutant Conversion, University of Science and Technology of China, Hefei 230026. Institute of Energy, Hefei Comprehensive National Science Center, Hefei 230031.

E-mail for Y. Fu: [fuyao@ustc.edu.cn](mailto:fuyao@ustc.edu.cn)

‡ These authors contributed equally to this work

**Table S1.** Comparison of reaction conditions of hydrogenation of levulinic acid over different nickel-based catalysts.

| Entry | Catalyst                                          | Ni content (wt. %) | Reaction conditions          | Selectivity (%) | Ref.      |
|-------|---------------------------------------------------|--------------------|------------------------------|-----------------|-----------|
| 1     | Ni/MgO                                            | 44                 | 150 °C, 1 MPa H <sub>2</sub> | 93.3            | 1         |
| 2     | Ni/Mg <sub>2</sub> Al <sub>2</sub> O <sub>5</sub> | 40                 | 160 °C, 3 MPa H <sub>2</sub> | 99.7            | 2         |
| 3     | Ni/ $\gamma$ -Al <sub>2</sub> O <sub>3</sub>      | 40                 | 180 °C, 3 MPa H <sub>2</sub> | 98.2            | 3         |
| 4     | Ni/NCMs                                           | 6.3                | 200 °C, 3 MPa H <sub>2</sub> | 99              | 4         |
| 5     | Ni/Al <sub>2</sub> O <sub>3</sub>                 | 15                 | 200 °C, 5 MPa H <sub>2</sub> | 100             | 5         |
| 6     | Ni/C-500                                          | 58.4               | 200 °C, 1 MPa H <sub>2</sub> | 98.2            | 6         |
| 7     | NiAl-LDH                                          | 7                  | 200 °C, 3 MPa H <sub>2</sub> | 100             | 7         |
| 8     | Ni-MoOx/C                                         | 10                 | 140 °C, 8 bar H <sub>2</sub> | 97              | 8         |
| 9     | Ni/Al <sub>2</sub> O <sub>3</sub> -CN-600         | 7.9                | 130 °C, 1 bar H <sub>2</sub> | > 99            | This work |

**Table S2.** Metal content of Ni/Al<sub>2</sub>O<sub>3</sub>-CN-T measured by ICP-OES.

| Entry | Catalyst                                  | Ni Content (wt %) |
|-------|-------------------------------------------|-------------------|
| 1     | Ni/Al <sub>2</sub> O <sub>3</sub> -CN-500 | 7.1               |
| 2     | Ni/Al <sub>2</sub> O <sub>3</sub> -CN-600 | 7.9               |
| 3     | Ni/Al <sub>2</sub> O <sub>3</sub> -CN-700 | 8.3               |

**Table S3.** Surface atomic composition of Ni/Al<sub>2</sub>O<sub>3</sub>-CN-T measured by XPS.

| Entry | Catalyst                                  | Surface atomic composition (%) |      |      |     |
|-------|-------------------------------------------|--------------------------------|------|------|-----|
|       |                                           | Ni                             | Al   | C    | N   |
| 1     | Ni/Al <sub>2</sub> O <sub>3</sub> -CN-500 | 1.29                           | 25.0 | 26.1 | 0.7 |
| 2     | Ni/Al <sub>2</sub> O <sub>3</sub> -CN-600 | 1.23                           | 25.9 | 25.3 | 0.6 |
| 3     | Ni/Al <sub>2</sub> O <sub>3</sub> -CN-700 | 0.93                           | 27.3 | 23.9 | 0.4 |

**Table S4.** Textural and structural properties of NiO/Al<sub>2</sub>O<sub>3</sub>-CN-air and Ni/Al<sub>2</sub>O<sub>3</sub>-CN-T catalysts.

| catalyst                                   | Surface area (m <sup>2</sup> /g) | Pore volume (cm <sup>3</sup> /g) | Pore diameter (nm) |
|--------------------------------------------|----------------------------------|----------------------------------|--------------------|
| NiO/Al <sub>2</sub> O <sub>3</sub> -CN-air | 67.70                            | 0.10                             | 5.91               |
| Ni/Al <sub>2</sub> O <sub>3</sub> -CN-500  | 240.29                           | 0.18                             | 4.54               |
| Ni/Al <sub>2</sub> O <sub>3</sub> -CN-600  | 162.79                           | 0.20                             | 4.78               |
| Ni/Al <sub>2</sub> O <sub>3</sub> -CN-700  | 145.12                           | 0.20                             | 5.49               |

**Table S5.** The effect of the reaction solvents on the hydrogenation of levulinic acid over different solvents.

| Entry | Catalyst                                                | Solvent          | Conv. | Sele. | Ref. |
|-------|---------------------------------------------------------|------------------|-------|-------|------|
| 1     | Ru <sub>3</sub> TPA                                     | Methanol         | 92%   | 75%   | 9    |
|       |                                                         | Ethanol          | 91%   | 68%   |      |
|       |                                                         | Isopropanol      | 65%   | 61%   |      |
|       |                                                         | Butanol          | 52%   | 50%   |      |
|       |                                                         | Dioxane          | 95%   | 100%  |      |
|       |                                                         | H <sub>2</sub> O | 80%   | 90%   |      |
| 2     | CuPS-R <sub>350</sub> -C <sub>8</sub> -R <sub>350</sub> | THF              | 95.7% | 89.0% | 10   |
|       |                                                         | Ethanol          | 81.6% | 90.0% |      |
|       |                                                         | Water            | 45.5% | 89.0% |      |
| 3     | Ru-TS                                                   | THF              | 61%   | 0%    | 11   |
|       |                                                         | Methanol         | 95%   | 62%   |      |
|       |                                                         | Ethanol          | 98%   | 86%   |      |
|       |                                                         | Butanol          | 80%   | 76%   |      |
|       |                                                         | Dioxane          | 21%   | 5%    |      |
| 4     | Ru/TiO <sub>2</sub> -n                                  | H <sub>2</sub> O | >99%  | >99%  | 12   |

|   |                                                                                                |                  |       |       |    |
|---|------------------------------------------------------------------------------------------------|------------------|-------|-------|----|
|   |                                                                                                | Methanol         | 63%   | 32.8% |    |
|   |                                                                                                | Ethanol          | 28%   | >99%  |    |
|   |                                                                                                | Dioxane          | 0%    | 0%    |    |
|   |                                                                                                | THF              | ≈82%  | -     |    |
| 5 | CuNi@SiO <sub>2</sub>                                                                          | H <sub>2</sub> O | ≈58%  | -     | 13 |
|   |                                                                                                | Isopropanol      | 99%   | 96.8% |    |
|   |                                                                                                | Dioxane          | ≈38%  |       |    |
|   |                                                                                                | Toluene          | 24%   | 87.5% |    |
| 6 | Ni-MoO <sub>x</sub> /C                                                                         | Dioxane          | 13%   | 30.8% | 8  |
|   |                                                                                                | H <sub>2</sub> O | 2%    | 100%  |    |
|   |                                                                                                | No solvent       | 100%  | 97%   |    |
| 7 | Ni <sub>4.59</sub> Cu <sub>1</sub> Mg <sub>1.58</sub><br>Al <sub>1.96</sub> Fe <sub>0.70</sub> | Water            | 67.5% | 67.5% | 14 |
|   |                                                                                                | Methanol         | 98.1% | 98.1% |    |
|   |                                                                                                | H <sub>2</sub> O | ≈2%   | ≈99%  |    |
|   |                                                                                                | Methanol         | ≈80%  | ≈3%   |    |
| 8 | Ni/MgO                                                                                         | Ethanol          | ≈52%  | ≈30%  | 1  |
|   |                                                                                                | isopropanol      | 100%  | 93.3% |    |
|   |                                                                                                | Dioxane          | ≈89%  | ≈96%  |    |
|   |                                                                                                | THF              | 21%   | 95%   |    |
|   |                                                                                                | H <sub>2</sub> O | >99%  | >99%  |    |
| 9 | Ni-Sn(1.4)/<br>AlOH                                                                            | Methanol         | 14%   | 0%    | 15 |
|   |                                                                                                | Ethanol          | 20%   | 0%    |    |
|   |                                                                                                | Isopropanol      | 10%   | 0%    |    |
|   |                                                                                                | Dioxane          | 35%   | 97.1% |    |

|    |                                           |                  |       |       |           |
|----|-------------------------------------------|------------------|-------|-------|-----------|
|    |                                           | THF              | 14.7% | 0%    |           |
|    |                                           | H <sub>2</sub> O | 69.2% | 99%   |           |
| 10 | Ru/N@CNTs                                 | Methanol         | 40.4% | 22%   | 16        |
|    |                                           | Ethanol          | 20%   | 35.5% |           |
|    |                                           | Isopropanol      | 12.1% | 90%   |           |
|    |                                           | Dioxane          | 21.9% | 84.9% |           |
|    |                                           |                  |       |       |           |
|    |                                           | THF              | >99%  | >99%  |           |
|    |                                           | H <sub>2</sub> O | 96.2% | 98.2% |           |
|    |                                           | Toluene          | 93.7% | 97.3% |           |
| 11 | Ni/Al <sub>2</sub> O <sub>3</sub> -CN-600 | Methanol         | >99%  | 86.6% | This work |
|    |                                           | Ethanol          | >99%  | 96.1% |           |
|    |                                           | Isopropanol      | 93.6% | 98.2% |           |
|    |                                           | Dioxane          | 82.1% | 96.6% |           |

**Table S6.** Ni contents of Ni/Al<sub>2</sub>O<sub>3</sub> before and after recycle measured by ICP-OES.

| Entry | Sample                                                 | Ni contents (wt %) |
|-------|--------------------------------------------------------|--------------------|
| 1     | Fresh Ni/Al <sub>2</sub> O <sub>3</sub> -CN-600        | 7.9                |
| 2     | Ni/Al <sub>2</sub> O <sub>3</sub> -CN-600 after 5 runs | 7.7                |
| 3     | Fresh Ni/Al <sub>2</sub> O <sub>3</sub>                | 9.4                |
| 4     | Ni/Al <sub>2</sub> O <sub>3</sub> after 5 runs         | 7.0                |

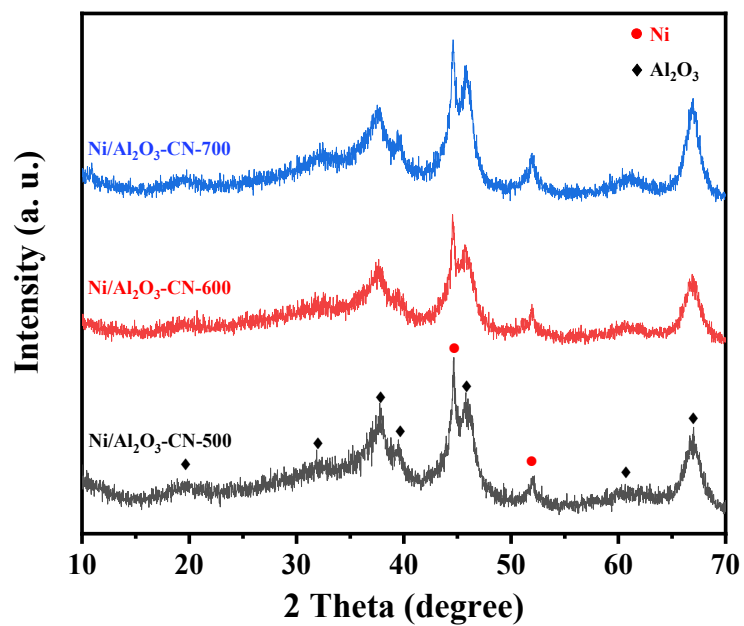

**Figure S1.** XRD pattern of the different Ni/Al<sub>2</sub>O<sub>3</sub>-CN-T catalysts.

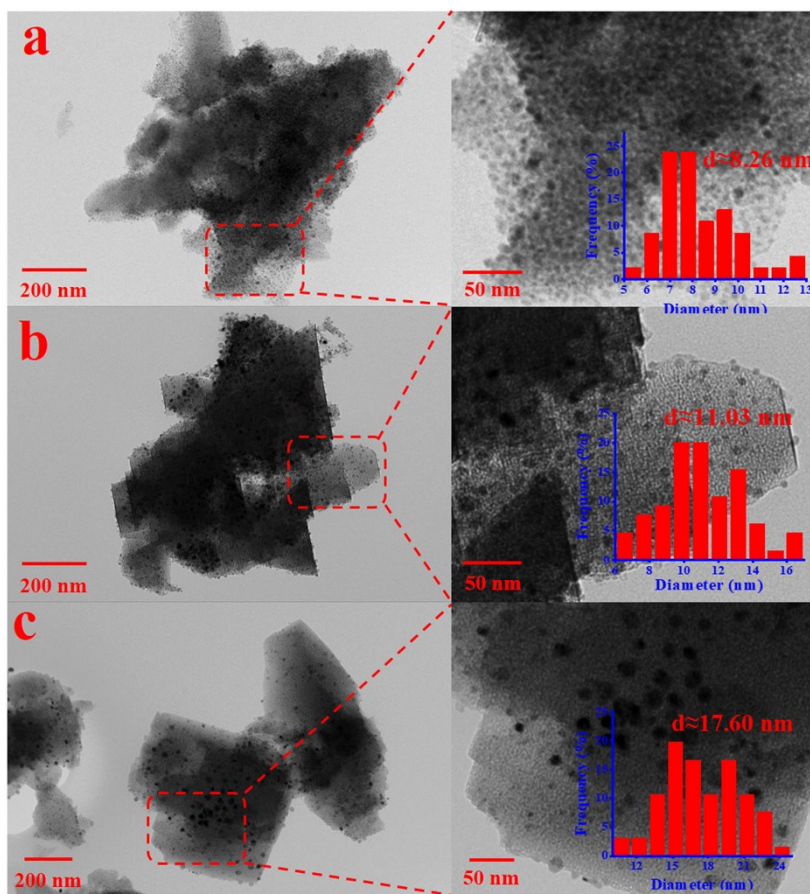

**Figure S2.** TEM images and average size distribution of nickel nanoparticles of the Ni/Al<sub>2</sub>O<sub>3</sub>-CN-500 (a), Ni/Al<sub>2</sub>O<sub>3</sub>-CN-500 (b) and Ni/Al<sub>2</sub>O<sub>3</sub>-CN-700 (c).

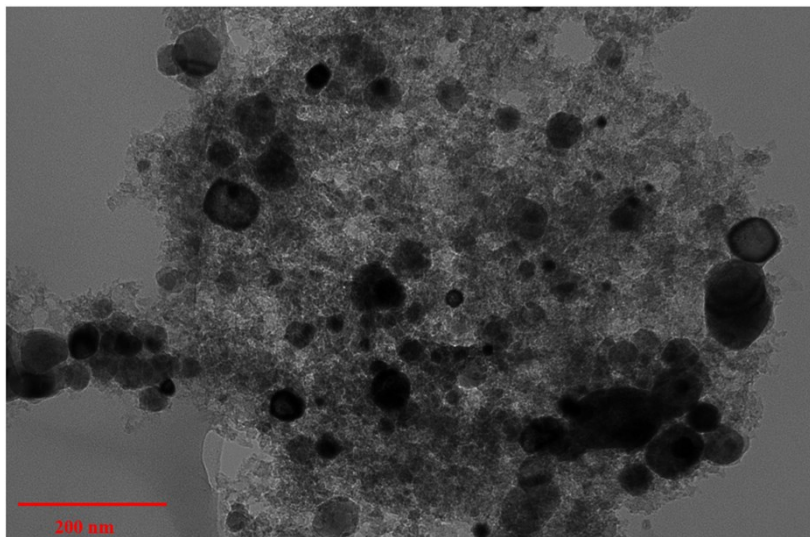

**Figure S3.** TEM image of Ni/CN-600.

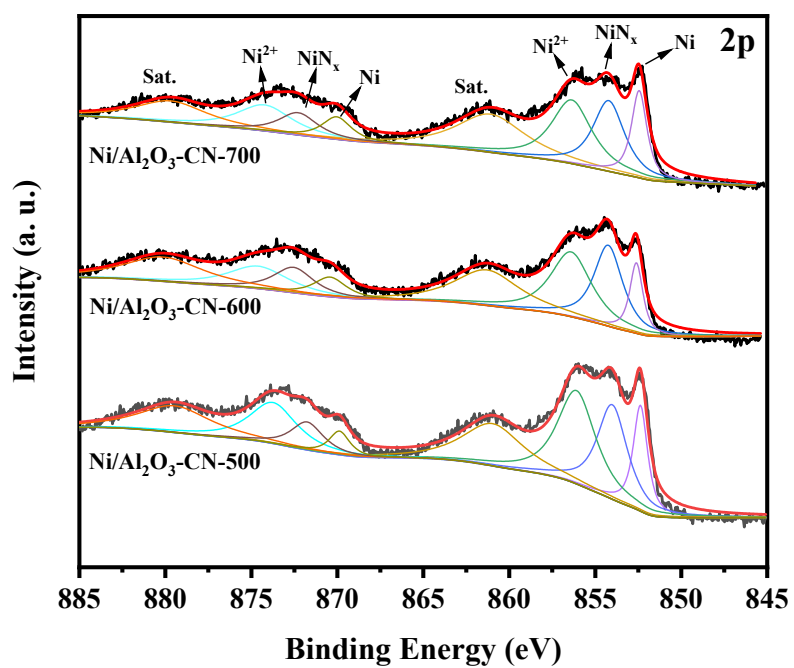

**Figure S4.** The Ni 2p XPS pattern of the different Ni/Al<sub>2</sub>O<sub>3</sub>-CN-T catalysts.

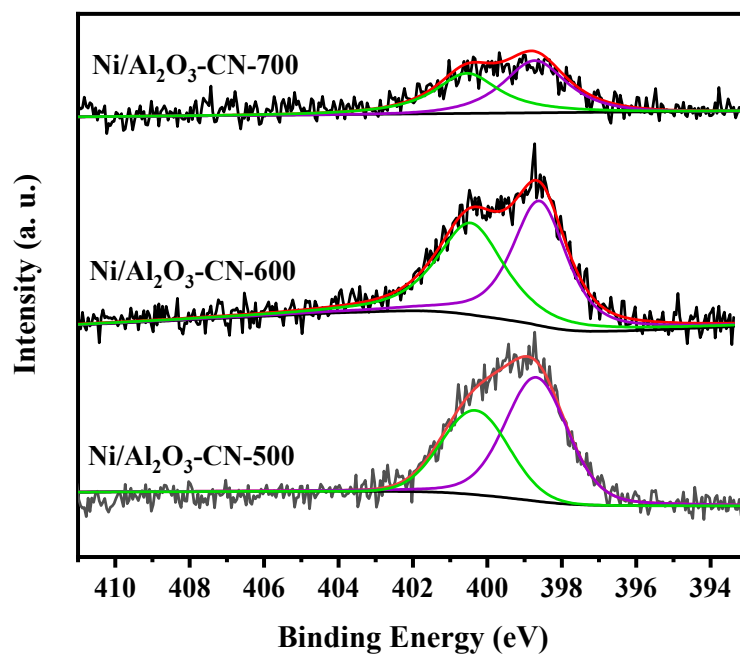

**Figure S5.** The N 1s XPS pattern of the different Ni/Al<sub>2</sub>O<sub>3</sub>-CN-T catalysts.



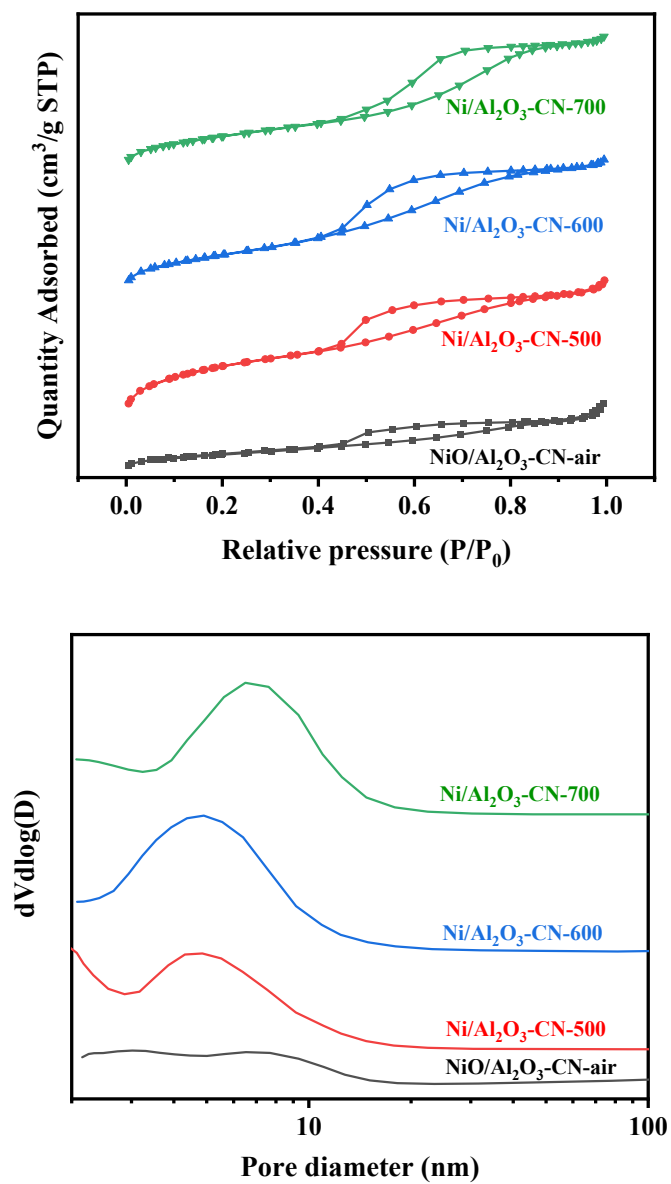

**Figure S6.**  $N_2$  adsorption-desorption isotherms and pore size distributions of  $NiO/Al_2O_3-CN-air$  and the  $Ni/Al_2O_3-CN-T$  catalysts.

## REFERENCES

1. Lv, J. K., Rong, Z. M., Wang, Y., Xiu, J. H., Wang, Y., Qu, J. P. Highly efficient conversion of biomass-derived levulinic acid into gamma-valerolactone over Ni/MgO catalyst. *RSC Adv.* **2015**, *5*, 72037-72045.
2. Jiang, K., Sheng, D., Zhang, Z. H., Fu, J., Hou, Z. Y., Liu, X. Y. Hydrogenation of levulinic acid to gamma-valerolactone in dioxane over mixed MgO-Al<sub>2</sub>O<sub>3</sub> supported Ni catalyst. *Catal. Today.* **2016**, *274*, 55-59.
3. Fu, J., Sheng, D., Lu, X. Y. Hydrogenation of Levulinic Acid over Nickel Catalysts Supported on Aluminum Oxide to Prepare gamma-Valerolactone. *Catalysts.* **2016**, *6*, 6.
4. Liu, D. W., Zhang, L. N., Han, W. P., Tang, M. X., Zhou, L. G., Zhang, Y., Li, X. K., Qin, Z. F., Yang, H. Q. One-step fabrication of Ni-embedded hierarchically-porous carbon microspheres for levulinic acid hydrogenation. *Chem. Eng. J.* **2019**, *369*, 386-393.
5. Hengst, K., Schubert, M., Carvalho, H. W. P., Lu, C. B., Kleist, W., Grunwaldt, J. D. Synthesis of  $\gamma$ -valerolactone by hydrogenation of levulinic acid over supported nickel catalysts. *Appl. Catal., A.* **2015**, *502*, 18-26.
6. Xu, H., Hu, D., Yi, Z. X., Wu, Z. T., Zhang, M., Yan, K. Solvent Tuning the Selective Hydrogenation of Levulinic Acid into Biofuels over Ni-Metal Organic Framework-Derived Catalyst. *ACS Appl. Energy Mater.* **2019**, *2*, 6979-6983.
7. Gundekari, S., Srinivasan, K. In situ generated Ni(0)@boehmite from NiAl-LDH: An efficient catalyst for selective hydrogenation of biomass derived levulinic acid to gamma-valerolactone. *Catal. Commun.* **2017**, *102*, 40-43.

8. Shimizu, K., Kanno, S., Kon, K. Hydrogenation of levulinic acid to  $\gamma$ -valerolactone by Ni and MoO<sub>x</sub> co-loaded carbon catalysts. *Green Chem.* **2014**, *16*, 3899-3903.
9. Koley, P., Rao, B. S., Shit, S. C., Sabri, Y., Mondal, J., Tardio, J., Lingaiah, N. One-pot conversion of levulinic acid into gamma-valerolactone over a stable Ru tungstosphosphoric acid catalyst. *Fuel.* **2021**, *289*, 119900.
10. Tsou, Y. J., To, T. D., Chiang, Y. C., Lee, J. F., Kumar, R., Chung, P. W., Lin, Y. C. Hydrophobic Copper Catalysts Derived from Copper Phyllosilicates in the Hydrogenation of Levulinic Acid to  $\gamma$ -Valerolactone. *ACS Appl. Mater. Interfaces.* **2020**, *12*, 54851-54861.
11. Almeida, L. D., Rocha, A. L. A., Rodrigues, T. S., Robles-Azocar, P. A. Highly selective hydrogenation of levulinic acid catalyzed by Ru on TiO<sub>2</sub>-SiO<sub>2</sub> hybrid support. *Catal. Today.* **2020**, *344*, 158-165.
12. Li, S. P., Wang, Y. Y., Yang, Y. D., Chen, B. F., Tai, J., Liu, HZ., Han, B. X. Conversion of levulinic acid to  $\gamma$ -valerolactone over ultra-thin TiO<sub>2</sub> nanosheets decorated with ultrasmall Ru nanoparticle catalysts under mild conditions. *Green Chem.* **2019**, *21*, 770-774.
13. Pendem, S., Mondal, I., Shrotri, A., Rao, B. S., Lingaiah, N. Mondal, J Unraveling the structural properties and reactivity trends of Cu–Ni bimetallic nanoalloy catalysts for biomass-derived levulinic acid hydrogenation. *Sustainable Energy Fuels.* **2018**, *2*, 1516-1529.
14. Zhang, J., Chen, J. Z., Guo, Y. Y., Chen, L. M. Effective Upgrade of Levulinic Acid into  $\gamma$ -Valerolactone over an Inexpensive and Magnetic Catalyst Derived from

Hydrotalcite Precursor. *ACS Sustainable Chem. Eng.* **2015**, *3*, 1708-1714.

15. Rodiansono., Astuti, M. D., Hara, T., Ichikuni, N., Shimazu, S. Efficient hydrogenation of levulinic acid in water using a supported Ni–Sn alloy on aluminium hydroxide catalysts. *Catal. Sci. Technol.* **2016**, *6*, 2955-2961.

16. Meng, Z., Liu, Y., Yang, G. X., Cao, Y. H., Wang, H. J., Peng, F., Liu, P. F., Yu, H. Electron-rich ruthenium on nitrogen-doped carbons promoting levulinic acid hydrogenation to  $\gamma$ -valerolactone: effect of metalsupport interaction. *ACS Sustainable Chem. Eng.* **2019**, *7*, 16501-16510.
